1 **Detecting corticospinal tract impairment in tumor patients with fiber density and tensor-**  
2 **based metrics**

3

4 L. S. Fekonja<sup>1,2\*</sup>, Z. Wang<sup>1</sup>, D. B. Aydogan<sup>3</sup>, T. Roine<sup>3</sup>, M. Engelhardt<sup>1,4</sup>, F. R. Dreyer<sup>2,6</sup>, P.  
5 Vajkoczy<sup>1</sup>, T. Picht<sup>1,2,4</sup>

6

7 <sup>1</sup>Department of Neurosurgery, Charité - Universitätsmedizin Berlin, Berlin, Germany.

8 <sup>2</sup>Cluster of Excellence: "Matters of Activity. Image Space Material", Humboldt-Universität zu  
9 Berlin, Berlin, Germany.

10 <sup>3</sup>Department of Neuroscience and Biomedical Engineering, Aalto University School of  
11 Science, Espoo, Finland.

12 <sup>4</sup>Einstein Center for Neurosciences Berlin, Charité - Universitätsmedizin Berlin, Berlin,  
13 Germany.

14 <sup>6</sup>Freie Universität Berlin, Brain Language Laboratory, Department of Philosophy and  
15 Humanities, Berlin, Germany.

16

17 \*Corresponding author: Lucius S. Fekonja

18 Address: Charité Universitätsmedizin Berlin

19 Klinik für Neurochirurgie mit Arbeitsbereich Pädiatrische  
20 Neurochirurgie

21 Campus Charité Mitte

22 Luisenstraße 64

23 10117 Berlin

24 Email: [lucius.fekonja@charite.de](mailto:lucius.fekonja@charite.de)

25 Orcid: 0000-0003-1973-4410

26

27 Keywords:

28 Tractography; Corticospinal tract; dMRI; Motor function; ADC; Tumor; TMS.

29

30 **Abstract**

31 Tumors infiltrating the motor system lead to significant disability, often caused by  
32 corticospinal tract injury. The delineation of the healthy-pathological white matter (WM)  
33 interface area, for which diffusion magnetic resonance imaging (dMRI) has shown promising  
34 potential, may improve treatment outcome. However, up to 90% of white matter (WM)  
35 voxels include multiple fiber populations, which cannot be correctly described with  
36 traditional metrics such as fractional anisotropy (FA) or apparent diffusion coefficient (ADC).  
37 Here, we used a novel fixel-based along-tract analysis consisting of constrained spherical  
38 deconvolution (CSD) based probabilistic tractography and fixel-based apparent fiber density  
39 (FD), capable of identifying fiber orientation specific microstructural metrics. We addressed  
40 this novel methodology's capability to detect corticospinal tract impairment.

41 We measured and compared tractogram-related FD and traditional microstructural  
42 metrics bihemispherically in 65 patients with WHO grade III and IV gliomas infiltrating the  
43 motor system. The cortical tractogram seeds were based on motor maps derived by  
44 transcranial magnetic stimulation. We extracted 100 equally distributed cross-sections along  
45 each streamline of corticospinal tract (CST) for along-tract statistical analysis. Cross-sections  
46 were then analyzed to detect differences between healthy and pathological hemispheres.

47 All metrics showed significant differences between healthy and pathologic  
48 hemispheres over the entire tract and between peritumoral segments. Peritumoral values  
49 were lower for FA and FD, but higher for ADC within the entire cohort. FD was more specific  
50 to tumor-induced changes in CST than ADC or FA, whereas ADC and FA showed higher  
51 sensitivity.

52 The bihemispheric along-tract analysis provides an approach to detect subject-  
53 specific structural changes in healthy and pathological WM. In the current clinical dataset,  
54 the more complex FD metrics did not outperform FA and ADC in terms of describing  
55 corticospinal tract impairment.

56

## 57 **1. Introduction**<sup>1</sup>

58 In previous studies we introduced the combination of navigated transcranial  
59 magnetic stimulation (TMS) cortical motor mapping and tractography to improve surgery of  
60 motor eloquent brain tumors (Krieg et al., 2016; Lefaucheur & Picht, 2016; Picht, Frey,  
61 Thieme, Kliesch, & Vajkoczy, 2016; Rosenstock, Grittner, et al., 2017). In a recent study we  
62 could also demonstrate that the segmental analysis of diffusion tensor imaging (DTI) derived  
63 metrics, such as fractional anisotropy (FA) and apparent diffusion coefficient (ADC),  
64 correlated with clinical outcomes (Rosenstock, Giampiccolo, et al., 2017). Here, we now set  
65 out to investigate whether more complex metrics derived from spherical deconvolution and  
66 probabilistic tractography, which allow for more detailed analysis of the white matter,  
67 would prove superior in terms of detecting tumor induced white matter (WM) changes. In  
68 this context we analyzed the structural impact of gliomas affecting the corticospinal tract  
69 (CST) in 65 patients. This was carried out without the generation of a group template  
70 because of the lateralized pathology, which allows a clear deduction of interhemispheric  
71 differences on the subject-level (D. A. Raffelt et al., 2015). We compared the pathological  
72 with the healthy hemisphere and focused on describing tumor-induced changes along the  
73 CST with dMRI. We used CSD-based probabilistic tractography at an individual scale within  
74 the MRtrix3 framework (Tournier et al., 2019).

75 DTI enables quantification of the molecular diffusion rate, ADC, or the directional  
76 preference of diffusion, FA (Soares, Marques, Alves, & Sousa, 2013). ADC and FA are  
77 established metrics integrated as predictive features in neurosurgical studies (Rosenstock,  
78 Giampiccolo, et al., 2017). The two main diffusion tensor-derived parameters, ADC and FA,  
79 are based on voxel-wise eigenvalues, which represent the magnitude of the diffusion

---

### <sup>1</sup> **Abbreviations**

ADC = Apparent diffusion coefficient; CSD = Constrained spherical deconvolution; CST = Corticospinal tract; dMRI = Diffusion magnetic resonance imaging; DTI = Diffusion tensor imaging; FA = Fractional anisotropy; FD = Fiber density; FDI = first dorsal interosseous; FOD = Fiber orientation distribution; GM = Grey matter; MEP = motor evoked potentials; nTMS = Navigated transcranial magnetic stimulation; RMT = Resting motor threshold; WM = White matter.

80 process in the principal diffusion orientation and two directions perpendicular to it. These  
81 values are influenced by different factors (Colby et al., 2012). ADC is a measure of the  
82 overall diffusivity in a single voxel, regardless of its orientation. It is higher where water  
83 diffuses more easily, e.g. in ventricles, lower in structures with high tissue density and  
84 consequently more diffusion barriers, such as GM (Van Hecke, Emsell, & Sunaert, 2016). FA  
85 describes the directional coherence of water diffusion in tissue and is modulated by  
86 numerous biological factors, such as the microstructural and architectural organization of  
87 white matter, myelination and non-white matter partial volume effects. Further influences  
88 on FA modulation are methodological factors, such as the choice of the estimation,  
89 preprocessing methods and subjective selection of regions of interests (ROIs) (Roine et al.,  
90 2014; Veraart, Sijbers, Sunaert, Leemans, & Jeurissen, 2013).

91 In contrast to DTI, CSD can distinguish complex fiber populations in the brain. In brief,  
92 CSD estimates fiber orientation distributions (FODs) within each voxel, based on the  
93 expected signal from a single collinearly oriented fiber population (Tournier, Calamante,  
94 Gadian, & Connelly, 2004). By leveraging the rich information in FODs, probabilistic  
95 tractography algorithms, such as the iFOD2, have been proposed to address limitations of  
96 tensor-based tractography methods (Tournier, Mori, & Leemans, 2011). In up to 90% of all  
97 WM voxels, multiple fiber orientations were observed, and 30% to 40% of these WM voxels  
98 contain more than three fiber populations (Jeurissen, Leemans, Tournier, Jones, & Sijbers,  
99 2013; Riffert, Schreiber, Anwander, & Knösche, 2014; Tournier, 2019; Vos, Jones, Jeurissen,  
100 Viergever, & Leemans, 2012). Moreover, non-white matter contamination is present in  
101 more than a third of the WM voxels (Roine et al., 2014) and has been addressed by multi-  
102 tissue CSD methods (Dhollander, Raffelt, & Connelly, 2016; Jeurissen, Tournier, Dhollander,  
103 Connelly, & Sijbers, 2014b; Roine et al., 2015).

104 A complete picture about the underlying white matter architecture is highly relevant  
105 with regard to adequate risk estimation and neurosurgical planning (Mormina et al., 2015).  
106 To that end, in addition to the conventional DTI measures, modern CSD-based fiber density  
107 (FD) and fixel-based analysis (FBA) methods offer promising opportunities, since they are  
108 related to the intra-axonal restricted compartment that is specific to a certain fiber  
109 orientation within a voxel (D. A. Raffelt et al., 2017). Based on its advantages for the analysis  
110 of crossing fiber regions, we expect this metric to improve the detection of tumor-induced  
111 changes along the CST, and obtain more specific information about the microstructural

112 effects of tumors in combination with traditional FA or ADC measures. Furthermore, we  
113 expect higher specificity of FD in detecting the peritumoral segments, most importantly at  
114 the tumor-white matter interface, which is surgically the most important area. However, the  
115 translation of advanced neuroimaging to clinical settings is slow both in terms of adapting  
116 modern methods and imaging protocols. While there exist tools to use the modern CSD and  
117 probabilistic tractography with conventional images, for tumor patients, little is known  
118 about how applicable they prove with existing conventional neuroimaging protocols.  
119 Nevertheless, clinical feasibility, robustness, and methodological superiority has been  
120 proven (Farquharson et al., 2013; Petersen et al., 2017). Until now, fixel-based studies have  
121 concentrated on group analyses without subject-specific examination of tumor patients for  
122 neurosurgical planning (D. A. Raffelt et al., 2017). We developed a new variant of FD for the  
123 fiber orientation specific along-tract investigation of microstructural properties in relation to  
124 infiltrating tumors.

125           Importantly, we used state-of-the-art TMS methods for motor mapping to find  
126 functionally critical regions of interest (ROIs) and used these as seed points to generate  
127 streamlines. This approach is shown to be highly effective for surgical planning (Picht et al.,  
128 2016), therefore it is superior to studying the whole CST, which lacks information about  
129 patient and tumor specific functional consequences of neurosurgery.

130

## 131 **2. Material & Methods**

### 132 **2.1. Ethical standard**

133 The study proposal is in accordance with ethical standards of the Declaration of Helsinki and  
134 was approved by the Ethics Commission of the Charité University Hospital (#EA1/016/19).  
135 All patients provided written informed consent for medical evaluations and treatments  
136 within the scope of the study.

137

### 138 **2.2 Patient selection**

139 We included n=65 left- and right-handed adult patients in this study (25 females, 40 males,  
140 age 55.6±15.2, age range 24-81). Only patients with an initial diagnosis of unilateral WHO  
141 grade III & IV gliomas (14 WHO grade III, 51 WHO grade IV) were included (Table 1). All  
142 tumors were infiltrating M1 and the CST or implied critical adjacency, either in the left or

143 right hemisphere. Patients with recurrent tumors, previous radiochemotherapy,  
144 multicentric or non-glial tumors were not considered.

145 Table 1. Patient demographics.

|                | Number (%) |
|----------------|------------|
| Demographics   |            |
| Sample size    | 65         |
| Age            | 55.6±15.2  |
| Female         | 25(38)     |
| Male           | 40(62)     |
| Glioma Degree  |            |
| Glioma III     | 14 (22)    |
| Glioma IV      | 51 (78)    |
| Tumor Location |            |
| Frontal        | 33 (51)    |
| Temporal       | 7 (11)     |
| Insular        | 9 (14)     |
| Parietal       | 16 (25)    |

146

### 147 2.3 Image acquisition

148 MRI data were acquired on a Siemens Skyra 3T scanner (Erlangen, Germany) equipped with  
149 a 32-channel receiver head coil at Charité University Hospital, Berlin, Department of  
150 Neuroradiology. These data consisted of a high-resolution T1-weighted structural (TR/TE/TI  
151 2300/2.32/900 ms, 9° flip angle, 256 × 256 matrix, 1 mm isotropic voxels, 192 slices,  
152 acquisition time: 5 min) and a single shell dMRI acquisition (TR/TE 7500/95ms, 2 × 2 × 2  
153 mm<sup>3</sup> voxels, 128 × 128 matrix, 60 slices, 3 b 0 volumes), acquired at b = 1000 s/mm<sup>2</sup> with 40  
154 gradient orientations, for a total acquisition time of 12 minutes.

155

### 156 2.4 Preprocessing and processing of MRI data

157 All T1 images were registered to the dMRI data sets using Advanced Normalization Tools  
158 (ANTs) with the Symmetric Normalization (SyN) transformation model (Avants et al., 2011;  
159 Grabner et al., 2006). The preprocessing of dMRI data included the following and was  
160 performed within MRtrix3 (Tournier et al., 2019) in order: denoising (Veraart et al., 2016),  
161 removal of Gibbs ringing artefacts (Kellner, Dhital, Kiselev, & Reisert, 2016), correction of  
162 subject motion (Leemans & Jones, 2009), eddy-currents (J. L. R. Andersson et al., 2017) and  
163 susceptibility-induced distortions (J. L. Andersson, Skare, & Ashburner, 2003) in FMRIB  
164 Software Library (Jenkinson, Beckmann, Behrens, Woolrich, & Smith, 2012), and subsequent  
165 bias field correction with ANTs N4 (Tustison et al., 2010). Each dMRI data set and processing  
166 step was visually inspected for outliers and artifacts. Scans with excessive motion were

167 initially excluded (over 10% outlier slices). We upsampled the dMRI data to a 1.3 mm  
168 isotropic voxel size before computing FODs to increase anatomical contrast and improve  
169 downstream tractography results and statistics. To obtain ADC and FA scalar maps, we first  
170 used diffusion tensor estimation using iteratively reweighted linear least squares estimator,  
171 resulting in scalar maps of tensor-derived parameters (Basser, Mattiello, & LeBihan, 1994;  
172 Veraart et al., 2013). For voxel-wise modelling we used a robust and fully automated and  
173 unsupervised method. This method allowed to obtain 3-tissue response functions  
174 representing single-fiber combined white and grey matter and CSF from our data with  
175 subsequent use of multi-tissue CSD to obtain tissue specific orientation distribution  
176 functions and white matter FODs (Dhollander et al., 2016; Jeurissen et al., 2014b; Tournier,  
177 Calamante, & Connelly, 2007).

178

## 179 **2.5 Transcranial magnetic stimulation**

180 Non-invasive functional motor mapping of both pathologic and healthy hemispheres was  
181 performed in each patient using navigated transcranial magnetic stimulation (nTMS) with  
182 Nexstim eXimia Navigated Brain Stimulation (NBS). Briefly, each patient's head was  
183 registered to the structural MRI through the use of anatomical landmarks and surface  
184 registration. The composite muscle action potentials were captured by the integrated  
185 electromyography unit (EMG) (sampling rate 3 kHz, resolution 0.3 mV; Neuroline 720,  
186 Ambu). The muscle activity (motor evoked potential, MEP amplitude  $\geq 50 \mu\text{V}$ ) was recorded  
187 by surface electrodes on the abductor pollicis brevis and first dorsal interosseous (FDI). First,  
188 the FDI hotspot, defined as the stimulation area that evoked the strongest MEP, was  
189 determined. Subsequently, the resting motor threshold (RMT), defined as the lowest  
190 stimulation intensity that repeatedly elicits MEPs, was defined using a threshold-hunting  
191 algorithm within the Nexstim eximia software. Mapping was performed at 105% RMT and  
192 0.25 Hz. All MEP amplitudes  $> 50 \mu\text{V}$  (peak to peak) were considered as motor positive  
193 responses and exported in the definitive mapping (Picht et al., 2011). The subject-specific  
194 positive responses of the FDI were exported as binary  $3 \times 3 \times 3 \text{ mm}^3$  voxel masks per  
195 response in the T1 image space.

196

## 197 **2.6 Tractography**

198 Probabilistic tractography was performed in each hemisphere with the iFOD2 algorithm by  
199 using above mentioned nTMS derived cortical seeding ROI. A second inclusion ROI was  
200 defined in the medulla oblongata. Tracking parameters were set to default with a FOD  
201 amplitude cutoff value of 0.1, a streamline minimum length of 5 x voxel size and a maximum  
202 streamline length of 100 x voxel size. For each tractogram describing the CST, we computed  
203 5000 streamlines per hemisphere. Each streamline of the tractograms was resampled along  
204 its length to 100 points. Peritumoral segments were defined in relation to the resampled  
205 points within the range 1-100 in all individual tractograms by visual inspection performed by  
206 one neuroscientist and one expert neurosurgeon with 4 and 20 years of experience, in that  
207 order. Subsequently, values of associated FA, ADC and FD scalar maps were sampled along  
208 the derived 100 segments of each streamline (Fig. 1 & 2). The code used for the  
209 tractography pipeline is archived as a shell script on Zenodo  
210 (<https://zenodo.org/record/3732348>) and openly accessible (Fekonja et al., 2020).

211

212 Fig. 1. TMS-based tractography of the CST and subsequent along-tract resampling of  
213 streamlines. The tractogram shows streamlines in relation to cortical hand representation  
214 derived by TMS-ROIs (left). The first zoom shows a combination with resampled points  
215 (yellow), overlaid on each streamlines (middle). The second, larger magnification reveals the  
216 single points, derived by resampling along the streamlines (right).

217

218 Fig. 2. CST tractogram with mapped ADC (left), FA (middle) and FD (right) scalar values,  
219 illustrating the methodological differences of scalar maps sampling.

220

## 221 **2.7 Computation of along-tract FD values using FBA**

222 A fixel is considered as a specific fiber population within a voxel (D. A. Raffelt et al., 2015; D.  
223 A. Raffelt et al., 2017). For each subject, segmentations of continuous FODs via the integrals  
224 of the FOD lobes were performed to produce discrete fixel maps which are developed to  
225 indicate voxel-based measures of axon diameters, weighted by their relative volumes within  
226 voxels (D. A. Raffelt et al., 2017; Smith, Tournier, Calamante, & Connelly, 2013). With  
227 higher-order diffusion models, such as CSD, parameters related to FD can be extracted for  
228 individual fixels (D. A. Raffelt et al., 2015). FBA is able to identify effects in specific fiber  
229 pathways and in crossing fibers regions, unlike voxel-based analysis (D. A. Raffelt et al.,



230 2015). After obtaining the fixels for all voxels in an image, FD values along CST tractograms  
231 were computed in 4 steps: (i) fixels associated with CSTs were obtained using fixel tract-  
232 density imaging, (ii) fixels in the image were thresholded based on the CST fixels which  
233 eliminates the contributions of other tracts that are present in these voxels, (iii) the mean  
234 FD of the remaining fixels were exported as a scalar image, and (iv) FD values were  
235 interpolated along the 100 sampled points of each streamline present in the CST  
236 tractograms. The code used for the tract-based fixel image construction pipeline is archived  
237 as a shell script on Zenodo (<https://zenodo.org/record/3732348>) and openly accessible  
238 (Fekonja et al., 2020).

239

## 240 **2.8 Statistical analysis**

241 Confirmatory statistical analysis was performed using RStudio version 1.2.5019  
242 (<https://rstudio.com>) with R version 3.6.1 (<https://cran.r-project.org>). We compared FD  
243 with traditional tensor-derived ADC and FA to study signal changes between healthy and  
244 pathological hemispheres. To analyze the behavior of the different metrics, we used above  
245 mentioned resampled streamlines, comparing the median values for each of the 100 CST  
246 segments per 5000 streamlines per hemisphere. To model the tumor-related effect on each  
247 metric, a linear mixed model (package lmerTest\_3.1-0 under R version 3.6.1) was built for  
248 each metric using the metric's value as dependent variable, hemisphere (0, healthy; 1,  
249 pathological) as independent variable and a random intercept for subjects (Kuznetsova,  
250 Brockhoff, & Christensen, 2017). Thus, each model contained 13000 data points (65 subjects  
251 \* 2 hemispheres \* 100 median tract segment values per streamline). Further, we repeated  
252 this analysis for the peritumoral area according to our hypothesis to find stronger effects in  
253 these segments. Each of these models contained 4138 data points, with each subject  
254 contributing a different number of peritumoral segments depending on tumor location and  
255 size. All effects were considered significant using a two-sided p-value of 0.05. All models  
256 were examined for patterns in the residuals (deviation from normality via QQ-plots, pattern  
257 fitted values vs. residuals). All plots were generated with the ggplot2 library within tidyverse  
258 (Wickham, 2009; Wickham et al., 2019). Tests for sensitivity ( $n$  of true positive predicted  
259 segments/ $n$  of true positive predicted segments +  $n$  of false negative predicted segments)  
260 and specificity ( $n$  of true negative predicted segments/ $n$  of true negative predicted  
261 segments +  $n$  of false positive predicted segments) were based on classified tract segments

262 (0 non-tumorous, 1 tumorous) in relation to the obtained significant or non-significant  
263 differences between healthy and pathological hemispheres per segment (classified as 0 and  
264 1). These tests were performed with Bonferroni-adjusted alpha levels of 0.0005 (0.05/100)  
265 and thresholded only for large effects ( $\geq 0.474$ ) with Cliff's delta due to the non-normal  
266 distribution. The script used to perform the statistical analysis and produce this manuscript  
267 is available on and archived in Zenodo (Fekonja et al., 2020).

## 268 **2.9 Data availability**

269 Parts of the data that support the findings of this study are not publicly available due to  
270 information that could compromise the privacy of the research participants but are  
271 available from the corresponding author on reasonable request. However, code we have  
272 used is openly available under the following address  
273 (<https://doi.org/10.5281/zenodo.3732348>) and is cited at the corresponding passage in the  
274 article (Fekonja et al., 2020).

275

## 276 **3. Results**

277 TMS mapping, the calculation of TMS-ROI-based streamlines and the extraction of ADC, FA  
278 and FD were feasible in each subject (cf. Fig. 3) and showed either close tumor-tract  
279 distance ( $< 8\text{mm}$ ,  $n = 3$ ) or adjacency or direct infiltration of the CST by the tumor ( $n = 62$ ).  
280 Visual inspection of boxplots showed differences between pathological and healthy  
281 hemispheres for ADC, FA, and FD (Fig 4A). As expected, these differences were larger when  
282 looking at the peritumoral area only (Fig 4B). Further, a larger variability in ADC values could  
283 be observed in the pathological hemisphere in general and the peritumoral area specifically.  
284 When plotting values along the entire CST, distinct patterns of variation between  
285 hemispheres could be observed. ADC showed no significant differences in the non-  
286 peritumoral segments but showed significant differences in peritumoral segments, even  
287 stronger than FA and FD. In contrast, FA and FD values showed differences both in the non-  
288 peritumoral and peritumoral segments (Fig. 5, Fig. 6, Table 2). The distribution of tumors  
289 along the CST is indicated in Fig. 6. Additionally, the tumor-induced variability in peritumoral  
290 ADC values in contrast to the entire CST becomes particularly evident here (Fig. 5). Finally,  
291 the information shown in Fig. 2 highlights and visualizes the advantages of FOD  
292 representation in regard to multiple fiber populations. The CSD method identifies multiple  
293 appropriately oriented fiber populations in a voxel including multiple fiber populations,

294 while the DTI-based method does not represent multiple fiber populations within each voxel  
295 and does not provide an orientation estimate corresponding to any of the existing fiber  
296 populations (Farquharson et al., 2013), cf. Fig. 3.

297

298 Fig. 3. Demonstration of different voxel-level modelling methods results and their  
299 subsequently obtained scalar maps, illustrated on a coronal section. The ROI is highlighted  
300 in a pre-processed diffusion image. Either diffusion tensor-ellipsoids as estimated by  
301 diffusion tensor imaging or FOD's estimated using CSD are shown. Further, their respective  
302 scalar maps such as ADC, FA, or fixel-based are depicted. The tensor-based scalar value does  
303 not represent any single fiber population in the voxel in comparison to the fixel-based  
304 metrics.

305

306 Fig. 4. Boxplots for ADC, FA FD for both hemispheres. (A) Values for the entire CST. (B)  
307 Values for the peritumoral segments only. Outliers are marked by small circles.

308

309 Fig. 5. Line plots illustrating ADC, FA and FD along the entire CST of both hemispheres (0,  
310 medulla oblongata; 100, cortex). The points indicate median values with their respective  
311 95% confidence intervals. The heat-maps demonstrate related Bonferroni-corrected p-  
312 values, derived by paired t-tests.

313

314 Fig. 6. Density plot displaying the distribution of tumors grouped by hemispheric occurrence.  
315 Additionally, the plot shows that no tumors occur below segment 25.

316

### 317 **3.1 Group wise analysis**

318 The results from the mixed model analysis confirmed our hypotheses. We expected FD to  
319 improve the detection of tumor-induced changes along the tract, in combination with  
320 traditional FA or ADC measures. Furthermore, we expected stronger effects in the  
321 peritumoral segments. Our results show significant differences between healthy and  
322 pathological hemispheres for ADC, FA, and FD in the peritumoral areas (Table 2). As  
323 expected, these effects can be confirmed in the peritumoral segments in all tested values  
324 (Table 3). Fig. 4 & 5 illustrate significantly lower values in the pathological hemisphere  
325 within the entire cohort and even greater differences within the peritumoral segments for

326 FD. Calculations for sensitivity and specificity yielded 63%, 74% and 42% sensitivity and 68%,  
 327 53% and 76% specificity for ADC, FA and FD in that order, reflecting a higher sensitivity for  
 328 ADC and FA to tumor induced microstructural differences, whereas FD showed higher  
 329 specificity to local WM architecture complexities or orientation dispersion.

330

331 Table 2. Results of linear mixed model analysis. Models 1-3 show results for the entire CST  
 332 for FA, ADC and FD, models 4-6 for the peritumoral segments respectively. The table shows  
 333 regression coefficients for the fixed effect of hemisphere and the intercept with their  
 334 respective standard error in brackets. Further, number of observations for each model, the  
 335 log likelihood ratio, Akaike information criterion and Bayesian information criterion are  
 336 stated.

|                        | <i>Dependent variable:</i>              |                                          |                                         |                                         |                                         |                                         |
|------------------------|-----------------------------------------|------------------------------------------|-----------------------------------------|-----------------------------------------|-----------------------------------------|-----------------------------------------|
|                        | FA                                      | ADC                                      | FD                                      | FA Peritumoral                          | ADC Peritumoral                         | FD Peritumoral                          |
| Pathologic hemispheres | -0.042<br>(-0.047, -0.038)<br>p < 2e-16 | 0.0001<br>(0.00005, 0.0001)<br>p < 2e-16 | -0.046<br>(-0.052, -0.039)<br>p < 2e-16 | -0.075<br>(-0.082, -0.069)<br>p < 2e-16 | 0.0001<br>(0.0001, 0.0001)<br>p < 2e-16 | -0.067<br>(-0.076, -0.057)<br>p < 2e-16 |
| Constant               | 0.560<br>(0.552, 0.567)<br>p < 2e-16    | 0.001<br>(0.001, 0.001)<br>p < 2e-16     | 0.718<br>(0.704, 0.732)<br>p < 2e-16    | 0.540<br>(0.515, 0.564)<br>p < 2e-16    | 0.001<br>(0.001, 0.001)<br>p < 2e-16    | 0.729<br>(0.689, 0.769)<br>p < 2e-16    |
| Observations           | 13,000                                  | 13,000                                   | 13,000                                  | 4,138                                   | 4,138                                   | 4,138                                   |
| Log Likelihood         | 7,926.707                               | 97,226.680                               | 2,486.618                               | 3,201.497                               | 31,060.070                              | 1,495.331                               |
| Akaike Inf. Crit.      | -15,845.410                             | -194,445.400                             | -4,965.236                              | -6,394.995                              | -62,112.150                             | -2,982.661                              |
| Bayesian Inf. Crit.    | -15,815.520                             | -194,415.500                             | -4,935.345                              | -6,369.683                              | -62,086.840                             | -2,957.349                              |

337

338 In addition to these analyses, we calculated the mean of the entire cohort of ADC, FA and FD  
 339 differences between the healthy and pathological hemispheres with respect to healthy  
 340 segments only, pathological segments only and healthy-pathological WM interface (range of  
 341 3 voxels) for tumor external as well as internal segments (Fig. 7). The results indicate that  
 342 ADC is stronger altered within the pathological WM area, while FA and FD show alterations  
 343 along the entire CST. Furthermore, FD shows stronger differences in the healthy-  
 344 pathological WM interface.

345

346 Fig. 7. Box plots of cohort mean of ADC, FA and FD differences between the healthy and  
 347 pathological hemispheres with respect to healthy segments only (A), pathological segments

348 only (B) and tumor-healthy WM interface for tumor external (C) as well as internal segments  
349 (D).

350

### 351 **3.2 Subject-specific analysis**

352 The differences are illustrated by means of two example cases (Fig. 8 and Table 3). Four  
353 further case-specific examples are given in the supplementary materials (supplementary Fig.  
354 1-4 & supplementary Tables 1-4). The exemplary cases were randomly selected by a script.

355 Case A: This patient in his 80's was brought to our emergency room with suspected stroke.  
356 A sudden weakness in the legs had occurred, causing the patient to collapse without losing  
357 consciousness. Furthermore, it was reported that the patient had been suffering from  
358 dizziness for several weeks. Conventional MRI confirmed a left parietal mass with extensive  
359 perifocal edema. The patient was diagnosed with a left postcentral WHO grade IV  
360 glioblastoma and right leg emphasized hemiparesis. The indication for resection of the mass  
361 was given.

362 Case B: This patient in his 60's presented with a several weeks history of dysesthesia in his  
363 left arm and right hand with associated arm weakness. He also felt insecure when walking  
364 and suffered from a general weakness. Conventional MRI confirmed the presence of a right  
365 frontal mass. Following this, the patient was referred to our clinic. The patient was  
366 diagnosed with a complex focal seizure with right precentral WHO grade IV glioblastoma  
367 and Todd's paresis which included transient left hemiparesis. The indication for resection of  
368 the mass was given.

369

370 Our results show significant differences between healthy and pathological hemispheres in  
371 FD over the entire CST ( $p < .01$  and  $p < .01$ ) for both cases (Table 3). Case A shows significant  
372 differences in FA over the entire CST and in the peritumoral segments ( $p < .01$  and  $p < .01$ ).  
373 In addition, a significant difference ( $p < .05$ ) can be seen in the peritumoral area as well with  
374 respect to ADC. However, case B shows no significant differences for ADC and FA, neither  
375 between the entire healthy and pathological hemispheres nor in the peritumoral segments.  
376 The values of the two hemispheres overlap here in the non-peritumoral area, similar to the  
377 group wise results described above. Case A shows less overlap for FA and FD, also in the  
378 non-peritumoral segments, while ADC shows large overlap.

379

380 Fig. 8. Single subject line plots depicting ADC, FA and FD along the CST of both hemispheres  
 381 for case A (A) and B (B). The black lines indicate the peritumoral segments.

382

383 Table 3 (A-B). Results of linear mixed model analysis. Models 1-3 show results for the entire  
 384 CST for FA, ADC, and FD, models 4-6 for the peritumoral segments respectively. The table  
 385 shows regression coefficients for the fixed effect of hemisphere and the intercept with their  
 386 respective standard error in brackets. Further, number of observations for each model, the  
 387 log likelihood ratio, Akaike information criterion and Bayesian information criterion are  
 388 stated.

389 Table 3A.

|                        | Dependent variable:                    |                                         |                                        |                                        |                                             |                                        |
|------------------------|----------------------------------------|-----------------------------------------|----------------------------------------|----------------------------------------|---------------------------------------------|----------------------------------------|
|                        | FA                                     | ADC                                     | FD                                     | FA Peritumoral                         | ADC Peritumoral                             | FD Peritumoral                         |
| Pathologic hemispheres | 0.021<br>(0.008, 0.034)<br>p = 0.012   | 0.00000<br>(-0.00002, 0.00002)<br>p = 1 | 0.077<br>(0.038, 0.117)<br>p = 0.0012  | 0.055<br>(0.031, 0.080)<br>p = 0.00006 | 0.00004<br>(0.00002, 0.0001)<br>p = 0.00012 | -0.058<br>(-0.138, 0.023)<br>p = 0.972 |
| Constant               | 0.517<br>(0.488, 0.546)<br>p < 1.2e-15 | 0.001<br>(0.001, 0.001)<br>p < 1.2e-15  | 0.645<br>(0.611, 0.678)<br>p < 1.2e-15 | 0.371<br>(0.331, 0.411)<br>p < 1.2e-15 | 0.001<br>(0.001, 0.001)<br>p < 1.2e-15      | 0.705<br>(0.640, 0.771)<br>p < 1.2e-15 |
| Observations           | 200                                    | 200                                     | 200                                    | 40                                     | 40                                          | 40                                     |
| Log Likelihood         | 172.557                                | 1,488.435                               | 69.184                                 | 44.545                                 | 339.211                                     | 15.904                                 |
| Akaike Inf. Crit.      | -337.115                               | -2,968.871                              | -130.368                               | -81.090                                | -670.423                                    | -23.807                                |
| Bayesian Inf. Crit.    | -323.921                               | -2,955.678                              | -117.175                               | -74.334                                | -663.667                                    | -17.052                                |

390

Table 3B.

|                        | Dependent variable:                    |                                             |                                         |                                        |                                         |                                        |
|------------------------|----------------------------------------|---------------------------------------------|-----------------------------------------|----------------------------------------|-----------------------------------------|----------------------------------------|
|                        | FA                                     | ADC                                         | FD                                      | FA Peritumoral                         | ADC Peritumoral                         | FD Peritumoral                         |
| Pathologic hemispheres | -0.006<br>(-0.022, 0.011)<br>p = 1     | 0.00001<br>(-0.00000, 0.00003)<br>p = 0.606 | -0.033<br>(-0.057, -0.010)<br>p = 0.036 | 0.013<br>(-0.020, 0.045)<br>p = 1      | 0.00000<br>(-0.00002, 0.00003)<br>p = 1 | -0.012<br>(-0.037, 0.012)<br>p = 1     |
| Constant               | 0.562<br>(0.539, 0.585)<br>p < 1.2e-15 | 0.001<br>(0.001, 0.001)<br>p < 1.2e-15      | 0.705<br>(0.665, 0.744)<br>p < 1.2e-15  | 0.459<br>(0.432, 0.486)<br>p < 1.2e-15 | 0.001<br>(0.001, 0.001)<br>p < 1.2e-15  | 0.543<br>(0.510, 0.577)<br>p < 1.2e-15 |
| Observations           | 200                                    | 200                                         | 200                                     | 90                                     | 90                                      | 90                                     |
| Log Likelihood         | 176.595                                | 1,624.744                                   | 87.184                                  | 83.431                                 | 723.449                                 | 78.396                                 |
| Akaike Inf. Crit.      | -345.190                               | -3,241.488                                  | -166.367                                | -158.862                               | -1,438.898                              | -148.793                               |
| Bayesian Inf. Crit.    | -331.997                               | -3,228.295                                  | -153.174                                | -148.863                               | -1,428.898                              | -138.793                               |

391

## 392 **4. Discussion**

393 Morbidity due to brain tumor growth and their surgical treatment is often caused by  
394 impairment of relevant WM. Neuroimaging-based characterization of the healthy-  
395 pathological WM interface area is therefore crucial for neurosurgical planning. DTI based  
396 tractography has seen a widespread adoption in clinical neuroscience and practice in the  
397 recent years. Especially the combination of TMS and DTI for motor function-informed  
398 tractography has shown promising results. Yet, the interpretation of differences as  
399 measured by tensor-based scalar values is particularly challenging in regions with crossing  
400 fibers, since tensors reflect only the main diffusion direction (Jeurissen et al., 2013; D.  
401 Raffelt et al., 2012). Because the tensor representation is not able to distinguish crossing  
402 fiber populations present in the majority of the WM voxels, FA offers limited opportunities  
403 to quantitatively study WM integrity (Jeurissen et al., 2013; Van Hecke et al., 2016).  
404 Nevertheless, diffusion anisotropy can provide unique information about axonal anomalies  
405 (Mori & Tournier, 2014) as it decreases as a consequence of loss of coherence in the  
406 preferred main diffusion direction (Soares et al., 2013). In this context, studies also show  
407 that ADC is generally higher in damaged tissue due to increased free diffusion. This suggests  
408 that we can compare values of above mentioned metrics with a population average in order  
409 to determine whether they are unusually high or low, e.g. by comparing the subject-specific  
410 values of WM pathways of the healthy hemisphere with those of the pathological  
411 hemisphere or compare group-wise pathological populations with healthy ones (Mori &  
412 Tournier, 2014).

413 It has already been confirmed that many voxels along the CST contain considerable  
414 contributions of multiple fiber populations (Farquharson et al., 2013; Petersen et al., 2017).  
415 Nevertheless, our results indicate more significant segment-wise differences between the  
416 healthy and pathological hemispheres for FA and ADC in comparison to FD. This result was  
417 found in the group and individual tests. The investigation of other pathways may result in  
418 another order for the sensitivity and specificity of the metrics due to, for instance, different  
419 contributions of multiple fiber populations or extra axonal signal.

420

### 421 **4.1 FD metrics in clinical settings**

422 To better account for the complex microstructural organization of WM and its quantitative  
423 analysis, FD, which uses higher-order dMRI models such as FODs to analyze differences  
424 along WM pathways, allows to consider multiple fiber populations within a voxel. Multiple  
425 studies for group-wise statistical analysis of dMRI measures were published earlier (D.  
426 Raffelt et al., 2012; D. A. Raffelt et al., 2015; D. A. Raffelt et al., 2017). In contrast to these  
427 group-wise study designs, we used FD for an individual assessment of a specific tract for  
428 clinical validation. However, the presented higher sensitivity of ADC and FA indicates that  
429 these metrics are more appropriate and robust for peritumoral analysis. However, this may  
430 be due to the fact that FD has underperformed due to insufficient raw data. This finding  
431 highlights the need for better dMRI quality in clinical routine to be able to integrate  
432 advanced neuroimaging methods into clinical workflows. The discrepancy between clinical  
433 scan quality and advanced neuroimaging highlights the need to optimize raw data  
434 acquisition in order to leverage advanced neuroimaging modalities and methods into the  
435 clinical workflow (Farquharson et al., 2013; Jeurissen, Tournier, Dhollander, Connelly, &  
436 Sijbers, 2014a).

437 Our results demonstrate the feasibility of FD along-tract analysis as a tool to describe  
438 subject-and tract-specific tumor-induced changes. Moreover, our results demonstrate the  
439 addition of further information to that obtained only via ADC or FA. Earlier fixel studies,  
440 designed for group wise analysis of pathology-related effects, demonstrated that fixel-  
441 analyses are sensitive to WM changes in a variety of pathologies (D. A. Raffelt et al., 2015; D.  
442 A. Raffelt et al., 2017). In this study, we focused on subject-specific analyses, which showed  
443 higher sensitivity for ADC and FA, but higher specificity for FD. These findings are in line with  
444 other studies (Chamberland et al., 2019; Mormina et al., 2015). The higher specificity of FD  
445 in relation to correctly predict healthy segments is particularly relevant for presurgical  
446 analysis and intraoperative navigation in relation to risk assessment, but also for  
447 retrospective evaluation or outcome prediction models.

448

#### 449 **4.2 ADC, FA and FD characteristics in brain tumor patients**

450 In both cases subject-specific differences between the healthy and pathological  
451 hemispheres can be seen in the tumorous segments. Furthermore, differences between the  
452 non-pathological and pathological area can be seen as well in non-tumorous segments. This  
453 result may indicate a global effect of gliomas on the entire CST and neural connectivity,



454 affecting diffusion and voxel-wise white matter architecture modelling, especially in regard  
455 to FD. The results are consistent with the expected behavior of the different diffusion  
456 measures: ADC was higher in the pathological hemispheres which is attributed to the  
457 damaged tissue leading to increased diffusion. This finding might reflect the tumor-related  
458 degeneration of WM integrity, the edema surrounding the tumor and related increase of free-  
459 water (Mormina et al., 2015). FA and FD showed lower values in the pathological  
460 hemispheres compared to the corresponding segments in the healthy hemispheres. This  
461 result is consistent with the effect of the glioma-related loss of coherence in the preferred  
462 main diffusion directions (FA) and reduced fiber density (FD). This might be explained by the  
463 tumor infiltration or edema affecting the CST (Mormina et al., 2015). The ADC and FD values  
464 show a higher overlap of the healthy and pathological hemispheres in the non-peritumoral  
465 area.

466

#### 467 **4.3 Limitations**

468 Tractography suffers from a range of limitations that make its routine use problematic  
469 (Schilling et al., 2019). It is well known that tractograms contain false positive (Maier-Hein et  
470 al., 2017) and false negative (Aydogan et al., 2018) streamlines. In addition, tractography  
471 cannot distinguish between afferent and efferent connections, and streamlines may  
472 terminate improperly (Tournier, 2019). The dMRI data used for this study consists of a  
473 typical clinical single-shell acquisition, and is thus suboptimal for fiber density measurement  
474 due to incomplete attenuation of apparent extra-axonal signal (D. Raffelt et al., 2012). In  
475 this study we focused on the CST. Further studies could integrate a variety of fiber bundles  
476 to investigate the need for FD in along-tract statistical analysis.

477

#### 478 **5. Conclusions**

479 Our results show that the direct comparison between healthy and pathological hemispheres  
480 is sensitive to glioma-induced changes in structural integrity of the CST measured by  
481 different dMRI derived metrics. In contrast to our hypothesis, according to our data and  
482 analysis, FD did not outperform FA or ADC and all three metrics showed similar results for  
483 indicating tumor-induced changes of the CST. This finding highlights the need for better  
484 scans in clinical routine if one wants to introduce advanced neuroimaging modalities into  
485 clinical workflows.

486

## 487 **Funding**

488 L. F. and T. P. acknowledge the support of the Cluster of Excellence Matters of Activity.  
489 Image Space Material funded by the Deutsche Forschungsgemeinschaft (DFG, German  
490 Research Foundation) under Germany's Excellence Strategy – EXC 2025. T.R. received  
491 support from the Finnish Cultural Foundation.

## 492 **Acknowledgements**

493 This work was supported by the DFG (EXC 2025). The views expressed are those of the  
494 author(s) and not necessarily those of the DFG. We thank Heike Schneider for the numerous  
495 TMS-mappings.

496

## 497 **Competing interests**

498 The authors report no competing interests.

499

500

## 501 **References**

- 502 Andersson, J. L., Skare, S., & Ashburner, J. (2003). How to correct susceptibility distortions in  
503 spin-echo echo-planar images: application to diffusion tensor imaging. *Neuroimage*,  
504 20(2), 870-888. doi:10.1016/S1053-8119(03)00336-7
- 505 Andersson, J. L. R., Graham, M. S., Drobnyak, I., Zhang, H., Filippini, N., & Bastiani, M. (2017).  
506 Towards a comprehensive framework for movement and distortion correction of  
507 diffusion MR images: Within volume movement. *Neuroimage*, 152, 450-466.  
508 doi:10.1016/j.neuroimage.2017.02.085
- 509 Avants, B. B., Tustison, N. J., Song, G., Cook, P. A., Klein, A., & Gee, J. C. (2011). A  
510 reproducible evaluation of ANTs similarity metric performance in brain image  
511 registration. *Neuroimage*, 54(3), 2033-2044. doi:10.1016/j.neuroimage.2010.09.025
- 512 Aydogan, D. B., Jacobs, R., Dulawa, S., Thompson, S. L., Francois, M. C., Toga, A. W., . . . Shi, Y.  
513 (2018). When tractography meets tracer injections: a systematic study of trends and  
514 variation sources of diffusion-based connectivity. *Brain Struct Funct*, 223(6), 2841-  
515 2858. doi:10.1007/s00429-018-1663-8
- 516 Basser, P. J., Mattiello, J., & LeBihan, D. (1994). MR diffusion tensor spectroscopy and  
517 imaging. *Biophys J*, 66(1), 259-267. doi:10.1016/S0006-3495(94)80775-1
- 518 Chamberland, M., Raven, E. P., Genc, S., Duffy, K., Descoteaux, M., Parker, G. D., . . . Jones, D.  
519 K. (2019). Dimensionality reduction of diffusion MRI measures for improved  
520 tractometry of the human brain. *Neuroimage*, 200, 89-100.  
521 doi:10.1016/j.neuroimage.2019.06.020
- 522 Colby, J. B., Soderberg, L., Lebel, C., Dinov, I. D., Thompson, P. M., & Sowell, E. R. (2012).  
523 Along-tract statistics allow for enhanced tractography analysis. *Neuroimage*, 59(4),  
524 3227-3242. doi:10.1016/j.neuroimage.2011.11.004

- 525 Dhollander, T., Raffelt, D., & Connelly, A. (2016). *Unsupervised 3-tissue response function*  
526 *estimation from single-shell or multi-shell diffusion MR data without a co-registered*  
527 *T1 image*. Paper presented at the ISMRM Workshop on Breaking the Barriers of  
528 Diffusion MRI, At Lisbon, Portugal, Volume: pp. 5, Lisbon. Conference Paper  
529 retrieved from
- 530 Farquharson, S., Tournier, J. D., Calamante, F., Fabinyi, G., Schneider-Kolsky, M., Jackson, G.  
531 D., & Connelly, A. (2013). White matter fiber tractography: why we need to move  
532 beyond DTI. *J Neurosurg*, *118*(6), 1367-1377. doi:10.3171/2013.2.JNS121294
- 533 Fekonja, L. S., Wang, Z., Aydogan, D. B., Roine, T., Engelhardt, M., Dreyer, F. R., . . . Picht, T.  
534 (2020). Code used in article "CSD-based metric for along-tract statistical analysis in  
535 primary motor tumor patients". doi:10.5281/zenodo.3732349
- 536 Grabner, G., Janke, A. L., Budge, M. M., Smith, D., Pruessner, J., & Collins, D. L. (2006).  
537 Symmetric atlasing and model based segmentation: an application to the  
538 hippocampus in older adults. *Med Image Comput Comput Assist Interv*, *9*(Pt 2), 58-66.
- 539 Jenkinson, M., Beckmann, C. F., Behrens, T. E., Woolrich, M. W., & Smith, S. M. (2012). Fsl.  
540 *Neuroimage*, *62*(2), 782-790. doi:10.1016/j.neuroimage.2011.09.015
- 541 Jeurissen, B., Leemans, A., Tournier, J. D., Jones, D. K., & Sijbers, J. (2013). Investigating the  
542 prevalence of complex fiber configurations in white matter tissue with diffusion  
543 magnetic resonance imaging. *Hum Brain Mapp*, *34*(11), 2747-2766.  
544 doi:10.1002/hbm.22099
- 545 Jeurissen, B., Tournier, J. D., Dhollander, T., Connelly, A., & Sijbers, J. (2014a). Multi-tissue  
546 constrained spherical deconvolution for improved analysis of multi-shell diffusion  
547 MRI data. *Neuroimage*, *103*, 411-426. doi:10.1016/j.neuroimage.2014.07.061
- 548 Jeurissen, B., Tournier, J. D., Dhollander, T., Connelly, A., & Sijbers, J. (2014b). Multi-tissue  
549 constrained spherical deconvolution for improved analysis of multi-shell diffusion  
550 MRI data. *Neuroimage*, *103*, 411-426. doi:10.1016/j.neuroimage.2014.07.061
- 551 Kellner, E., Dhital, B., Kiselev, V. G., & Reisert, M. (2016). Gibbs-ringing artifact removal  
552 based on local subvoxel-shifts. *Magn Reson Med*, *76*(5), 1574-1581.  
553 doi:10.1002/mrm.26054
- 554 Krieg, S. M., Picht, T., Sollmann, N., Bahrend, I., Ringel, F., Nagarajan, S. S., . . . Tarapore, P. E.  
555 (2016). Resection of Motor Eloquent Metastases Aided by Preoperative nTMS-Based  
556 Motor Maps-Comparison of Two Observational Cohorts. *Front Oncol*, *6*, 261.  
557 doi:10.3389/fonc.2016.00261
- 558 Kuznetsova, A., Brockhoff, P. B., & Christensen, R. H. B. (2017). lmerTest Package: Tests in  
559 Linear Mixed Effects Models. *2017*, *82*(13), 26. doi:10.18637/jss.v082.i13
- 560 Leemans, A., & Jones, D. K. (2009). The B-matrix must be rotated when correcting for  
561 subject motion in DTI data. *Magn Reson Med*, *61*(6), 1336-1349.  
562 doi:10.1002/mrm.21890
- 563 Lefaucheur, J. P., & Picht, T. (2016). The value of preoperative functional cortical mapping  
564 using navigated TMS. *Neurophysiol Clin*, *46*(2), 125-133.  
565 doi:10.1016/j.neucli.2016.05.001
- 566 Maier-Hein, K. H., Neher, P. F., Houde, J. C., Cote, M. A., Garyfallidis, E., Zhong, J., . . .  
567 Descoteaux, M. (2017). The challenge of mapping the human connectome based on  
568 diffusion tractography. *Nat Commun*, *8*(1), 1349. doi:10.1038/s41467-017-01285-x
- 569 Mori, S., & Tournier, J. D. (2014). Chapter 7 - New Image Contrasts from Diffusion Tensor  
570 Imaging: Theory, Meaning, and Usefulness of DTI-Based Image Contrast. In

- 571 *Introduction to Diffusion Tensor Imaging (Second Edition)* (pp. 53-64). San Diego:  
572 Academic Press.
- 573 Mormina, E., Longo, M., Arrigo, A., Alafaci, C., Tomasello, F., Calamuneri, A., . . . Granata, F.  
574 (2015). MRI Tractography of Corticospinal Tract and Arcuate Fasciculus in High-  
575 Grade Gliomas Performed by Constrained Spherical Deconvolution: Qualitative and  
576 Quantitative Analysis. *AJNR Am J Neuroradiol*, *36*(10), 1853-1858.  
577 doi:10.3174/ajnr.A4368
- 578 Petersen, M. V., Lund, T. E., Sunde, N., Frandsen, J., Rosendal, F., Juul, N., & Ostergaard, K.  
579 (2017). Probabilistic versus deterministic tractography for delineation of the cortico-  
580 subthalamic hyperdirect pathway in patients with Parkinson disease selected for  
581 deep brain stimulation. *J Neurosurg*, *126*(5), 1657-1668.  
582 doi:10.3171/2016.4.JNS1624
- 583 Picht, T., Frey, D., Thieme, S., Kliesch, S., & Vajkoczy, P. (2016). Presurgical navigated TMS  
584 motor cortex mapping improves outcome in glioblastoma surgery: a controlled  
585 observational study. *J Neurooncol*, *126*(3), 535-543. doi:10.1007/s11060-015-1993-9
- 586 Picht, T., Schmidt, S., Brandt, S., Frey, D., Hannula, H., Neuvonen, T., . . . Suess, O. (2011).  
587 Preoperative functional mapping for rolandic brain tumor surgery: comparison of  
588 navigated transcranial magnetic stimulation to direct cortical stimulation.  
589 *Neurosurgery*, *69*(3), 581-588; discussion 588. doi:10.1227/NEU.0b013e3182181b89
- 590 Raffelt, D., Tournier, J. D., Rose, S., Ridgway, G. R., Henderson, R., Crozier, S., . . . Connelly, A.  
591 (2012). Apparent Fibre Density: a novel measure for the analysis of diffusion-  
592 weighted magnetic resonance images. *Neuroimage*, *59*(4), 3976-3994.  
593 doi:10.1016/j.neuroimage.2011.10.045
- 594 Raffelt, D. A., Smith, R. E., Ridgway, G. R., Tournier, J. D., Vaughan, D. N., Rose, S., . . .  
595 Connelly, A. (2015). Connectivity-based fixel enhancement: Whole-brain statistical  
596 analysis of diffusion MRI measures in the presence of crossing fibres. *Neuroimage*,  
597 *117*, 40-55. doi:10.1016/j.neuroimage.2015.05.039
- 598 Raffelt, D. A., Tournier, J. D., Smith, R. E., Vaughan, D. N., Jackson, G., Ridgway, G. R., &  
599 Connelly, A. (2017). Investigating white matter fibre density and morphology using  
600 fixel-based analysis. *Neuroimage*, *144*(Pt A), 58-73.  
601 doi:10.1016/j.neuroimage.2016.09.029
- 602 Riffert, T. W., Schreiber, J., Anwander, A., & Knösche, T. R. (2014). Beyond fractional  
603 anisotropy: extraction of bundle-specific structural metrics from crossing fiber  
604 models. *Neuroimage*, *100*, 176-191. doi:10.1016/j.neuroimage.2014.06.015
- 605 Roine, T., Jeurissen, B., Perrone, D., Aelterman, J., Leemans, A., Philips, W., & Sijbers, J.  
606 (2014). Isotropic non-white matter partial volume effects in constrained spherical  
607 deconvolution. *Front Neuroinform*, *8*, 28. doi:10.3389/fninf.2014.00028
- 608 Roine, T., Jeurissen, B., Perrone, D., Aelterman, J., Philips, W., Leemans, A., & Sijbers, J.  
609 (2015). Informed constrained spherical deconvolution (iCSD). *Med Image Anal*, *24*(1),  
610 269-281. doi:10.1016/j.media.2015.01.001
- 611 Rosenstock, T., Giampiccolo, D., Schneider, H., Runge, S. J., Bahrend, I., Vajkoczy, P., & Picht,  
612 T. (2017). Specific DTI seeding and diffusivity-analysis improve the quality and  
613 prognostic value of TMS-based deterministic DTI of the pyramidal tract. *Neuroimage  
614 Clin*, *16*, 276-285. doi:10.1016/j.nicl.2017.08.010
- 615 Rosenstock, T., Grittner, U., Acker, G., Schwarzer, V., Kulchytska, N., Vajkoczy, P., & Picht, T.  
616 (2017). Risk stratification in motor area-related glioma surgery based on navigated

- 617 transcranial magnetic stimulation data. *J Neurosurg*, 126(4), 1227-1237.  
618 doi:10.3171/2016.4.JNS152896
- 619 Schilling, K. G., Nath, V., Hansen, C., Parvathaneni, P., Blaber, J., Gao, Y., . . . Landman, B. A.  
620 (2019). Limits to anatomical accuracy of diffusion tractography using modern  
621 approaches. *Neuroimage*, 185, 1-11. doi:10.1016/j.neuroimage.2018.10.029
- 622 Smith, R. E., Tournier, J. D., Calamante, F., & Connelly, A. (2013). SIFT: Spherical-  
623 deconvolution informed filtering of tractograms. *Neuroimage*, 67, 298-312.  
624 doi:10.1016/j.neuroimage.2012.11.049
- 625 Soares, J. M., Marques, P., Alves, V., & Sousa, N. (2013). A hitchhiker's guide to diffusion  
626 tensor imaging. *Front Neurosci*, 7, 31. doi:10.3389/fnins.2013.00031
- 627 Tournier, J. D. (2019). Diffusion MRI in the brain - Theory and concepts. *Prog Nucl Magn*  
628 *Reson Spectrosc*, 112-113, 1-16. doi:10.1016/j.pnmrs.2019.03.001
- 629 Tournier, J. D., Calamante, F., & Connelly, A. (2007). Robust determination of the fibre  
630 orientation distribution in diffusion MRI: non-negativity constrained super-resolved  
631 spherical deconvolution. *Neuroimage*, 35(4), 1459-1472.  
632 doi:10.1016/j.neuroimage.2007.02.016
- 633 Tournier, J. D., Calamante, F., Gadian, D. G., & Connelly, A. (2004). Direct estimation of the  
634 fiber orientation density function from diffusion-weighted MRI data using spherical  
635 deconvolution. *Neuroimage*, 23(3), 1176-1185.  
636 doi:10.1016/j.neuroimage.2004.07.037
- 637 Tournier, J. D., Mori, S., & Leemans, A. (2011). Diffusion tensor imaging and beyond. *Magn*  
638 *Reson Med*, 65(6), 1532-1556. doi:10.1002/mrm.22924
- 639 Tournier, J. D., Smith, R., Raffelt, D., Tabbara, R., Dhollander, T., Pietsch, M., . . . Connelly, A.  
640 (2019). MRtrix3: A fast, flexible and open software framework for medical image  
641 processing and visualisation. *Neuroimage*, 202, 116137.  
642 doi:10.1016/j.neuroimage.2019.116137
- 643 Tustison, N. J., Avants, B. B., Cook, P. A., Zheng, Y., Egan, A., Yushkevich, P. A., & Gee, J. C.  
644 (2010). N4ITK: improved N3 bias correction. *IEEE Trans Med Imaging*, 29(6), 1310-  
645 1320. doi:10.1109/TMI.2010.2046908
- 646 Van Hecke, W., Emsell, L., & Sunaert, S. (2016). *Diffusion Tensor Imaging A Practical*  
647 *Handbook* (1st ed. 2016. ed.).
- 648 Veraart, J., Novikov, D. S., Christiaens, D., Ades-Aron, B., Sijbers, J., & Fieremans, E. (2016).  
649 Denoising of diffusion MRI using random matrix theory. *Neuroimage*, 142, 394-406.  
650 doi:10.1016/j.neuroimage.2016.08.016
- 651 Veraart, J., Sijbers, J., Sunaert, S., Leemans, A., & Jeurissen, B. (2013). Weighted linear least  
652 squares estimation of diffusion MRI parameters: strengths, limitations, and pitfalls.  
653 *Neuroimage*, 81, 335-346. doi:10.1016/j.neuroimage.2013.05.028
- 654 Vos, S. B., Jones, D. K., Jeurissen, B., Viergever, M. A., & Leemans, A. (2012). The influence of  
655 complex white matter architecture on the mean diffusivity in diffusion tensor MRI of  
656 the human brain. *Neuroimage*, 59(3), 2208-2216.  
657 doi:10.1016/j.neuroimage.2011.09.086
- 658 Wickham, H. (2009). *ggplot2: Elegant Graphics for Data Analysis*: Springer Publishing  
659 Company, Incorporated.
- 660 Wickham, H., Averick, M., Bryan, J., Chang, W., McGowan, L., François, R., . . . Yutani, H.  
661 (2019). Welcome to the Tidyverse. *Journal of Open Source Software*, 4(43), 1686.  
662

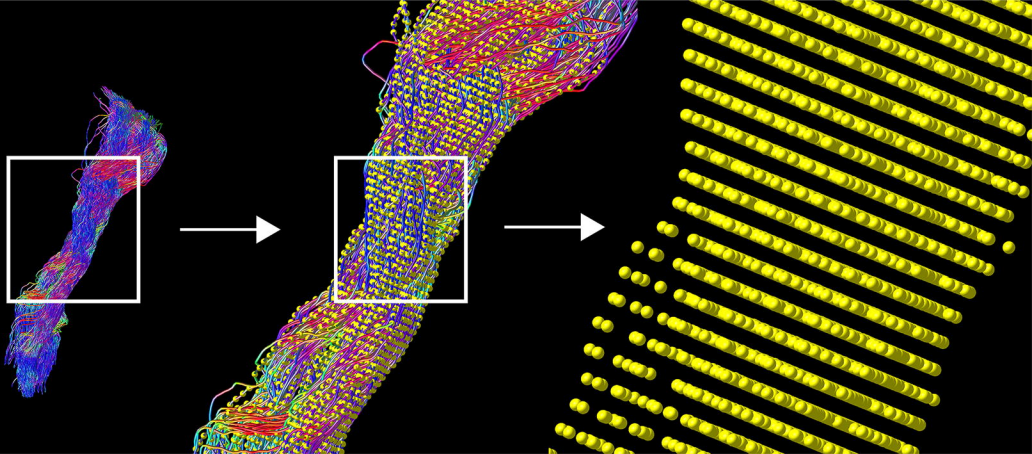

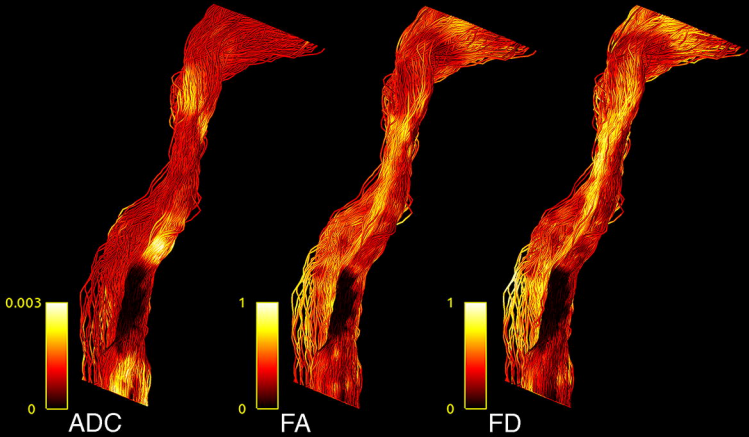

dMRI

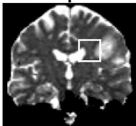

Tensors

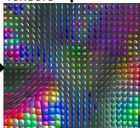

ADC scalar image

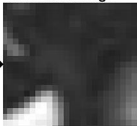

FA scalar image

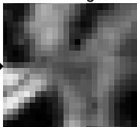

FODs

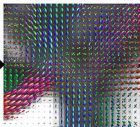

Fixels

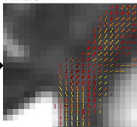

Fixel scalar image

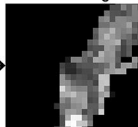



A

## dMRI measure

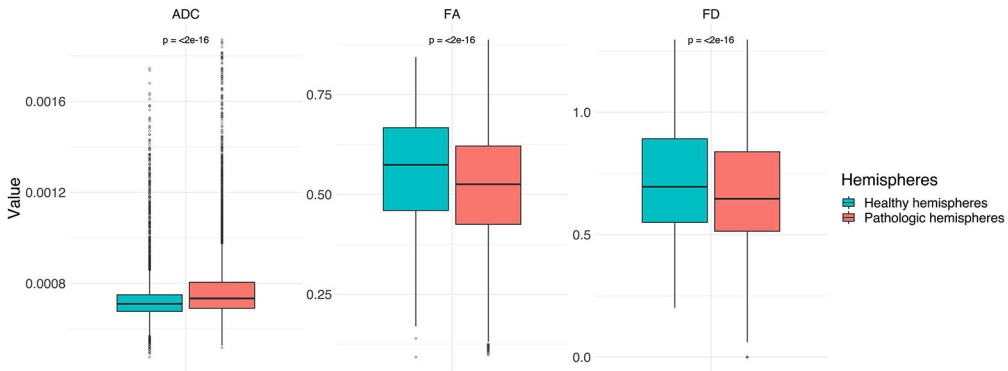

B

## dMRI measure

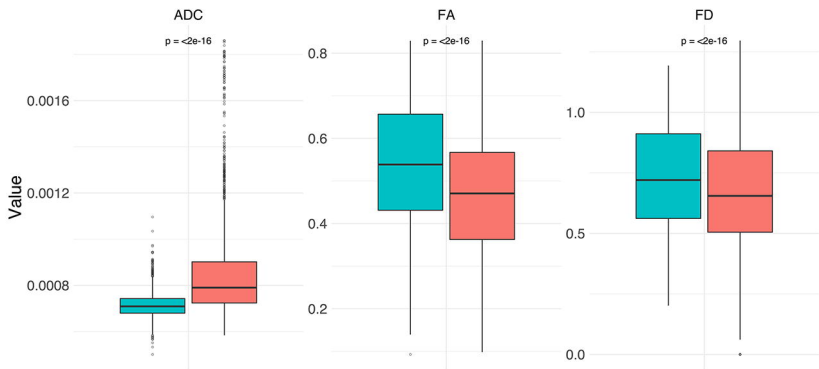

# Along tract measures

ADC

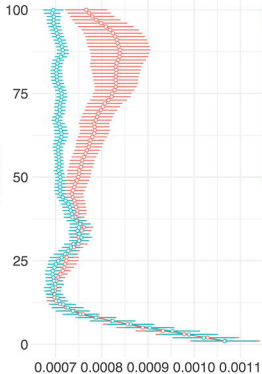

FA

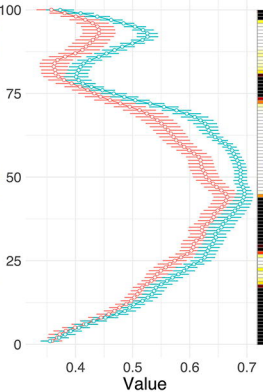

FD

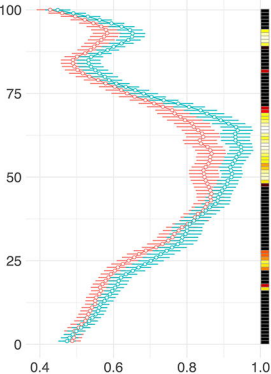

Hemispheres

- Healthy hemispheres
- Pathologic hemispheres

P-values

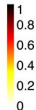

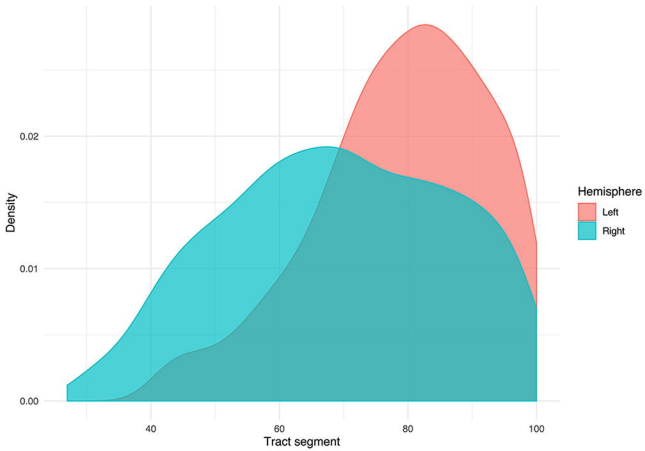

A

## dMRI measure

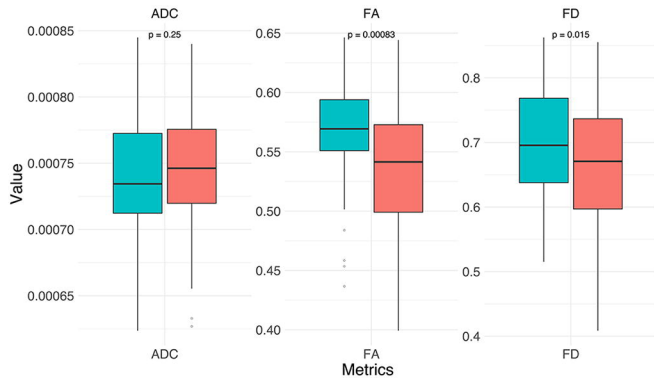

B

## dMRI measure

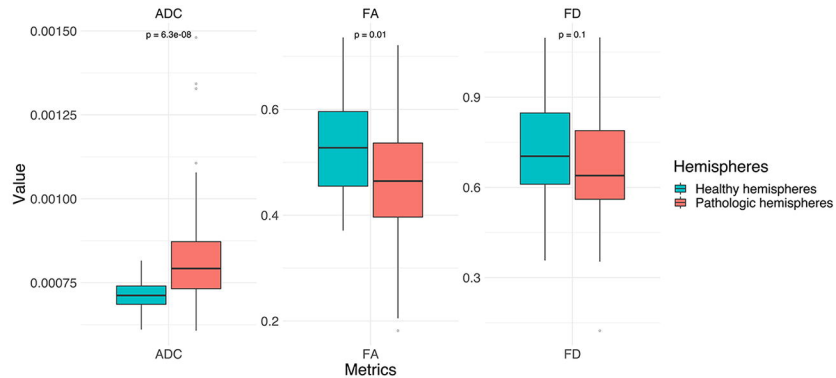

C

## dMRI measure

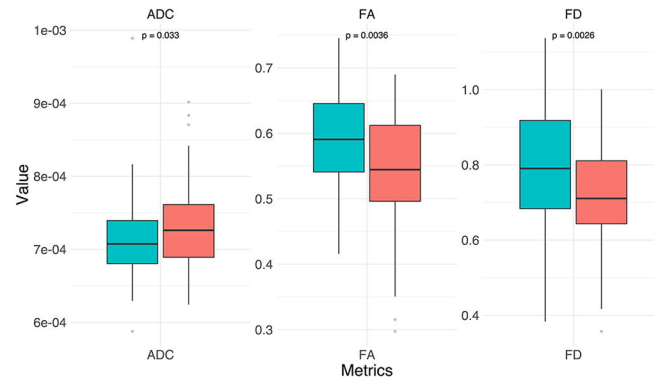

D

## dMRI measure

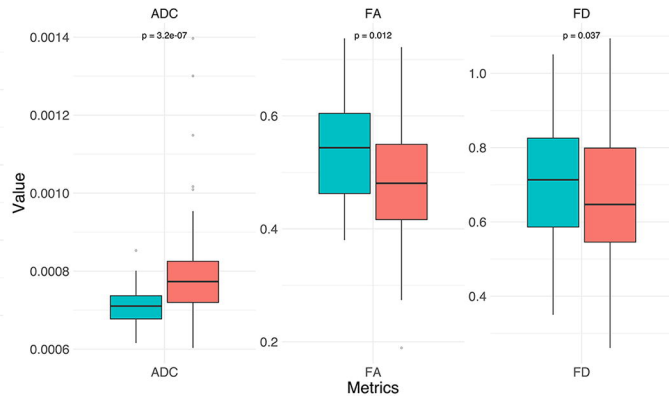

A

## Subject-specific along tract analysis

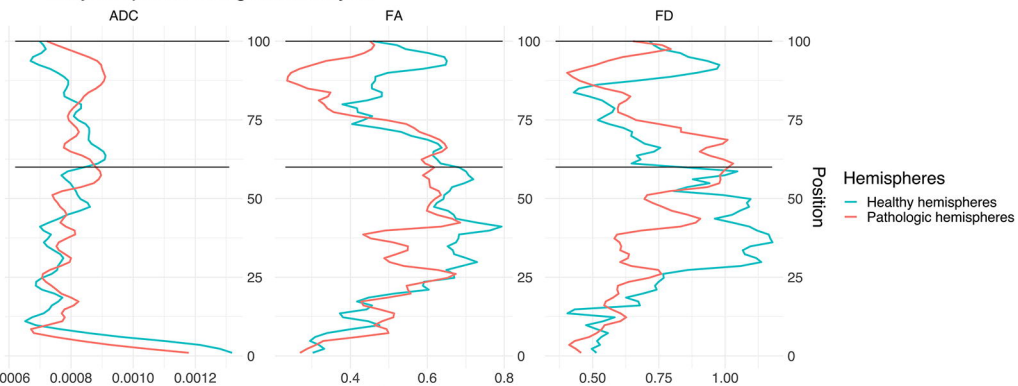

B

## Subject-specific along tract analysis

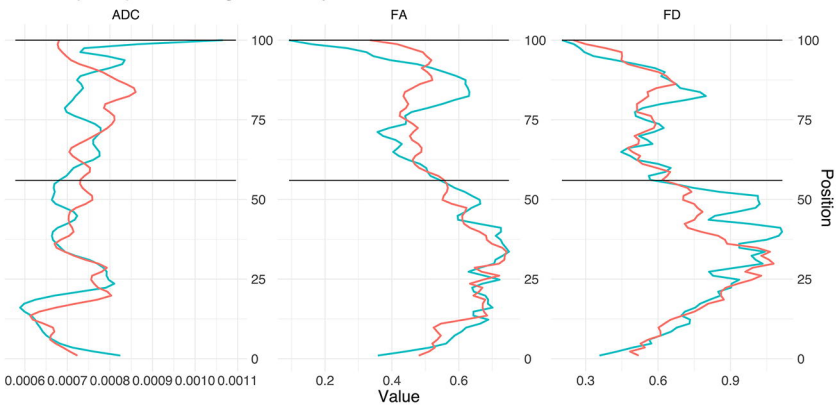

Source: https://medrxiv.org/content/10.1101/2020.10.28.20220293v1.full.pdf
